# Supplementary material for: Comparison of electrophysiological left bundle branch pacing characteristics in different bilateral electrode pacing vector configurations
Source: Frontiers journal article supplement (doi:10.3389/fcvm.2025.1500196), 2025-03-12
Supplement: Image_1.pdf [file Image_1.pdf]

## Full-fusion

Output higher than the threshold of LBB, LVS and RVS

### LBB+LVS+RVS

EGM: fusion wave from pacing signal

ECG: "QS, Qr, or QR" in V1, short V1\V6 RWPT, and narrow P-QRS

Decreasing the output

## Semi-fusion

One component of LBB, LVS or RVS lost capture

EGM: fusion wave changed to two connected individual waves

ECG: V1 RWPT prolonged

### LBB+LVS

EGM: fusion wave changed to two connected individual waves

ECG: similar with full fusion

### LBB+RVS

EGM: similar with full fusion

ECG: V6 RWPT prolonged

### RVS+LVS

Decreasing the output

## Select capture

Only one component was captured

EGM: two connected individual waves further isolated from the pacing signal

ECG: V1 RWPT further prolonged

LBB

EGM: similar with LBB+LVS

ECG: V6 RWPT prolonged

LVS

EGM: two connected individual waves further isolated from the pacing signal

ECG: V1 RWPT prolonged

LBB

EGM: similar with LBB+RVS

ECG: V6 RWPT prolonged

RVS

EGM: fusion wave changed to two connected individual waves

ECG: V1 RWPT prolonged

LVS

EGM: fusion wave changed to two connected individual waves

ECG: V6 RWPT further prolonged

RVS
